# Supplementary material
Source: PubMed Central journal article supplement (PMC3910566)
Supplement: 1314009111_sapp.pdf [file 1314009111_sapp.pdf]

## **Supporting Information For**

### **Unveiling the mechanism by which microsporidian parasites prevent locust's swarm behavior**

Wangpeng Shi<sup>a,1,2</sup>, Yang Guo<sup>a</sup>, Chuan Xu<sup>b</sup>, Shuqian Tan<sup>a</sup>, Jing Miao<sup>a</sup>, Yanjie Feng<sup>a</sup>,  
Hong Zhao<sup>b</sup>, Raymond J St. Leger<sup>c</sup>, Weiguo Fang<sup>b,2</sup>

- 1.** Department of Entomology, China Agricultural University, Beijing, 100193, China
- 2.** Institute of Microbiology, College of Life Science, Zhejiang University, Hangzhou,  
310058, China
- 3.** Department of Entomology, University of Maryland College Park, MD, 20742,  
USA

**Summary**

**Supporting methods**

**Supporting results**

**References**

**Supplementary figures**

**Supplementary tables**

## **Supporting methods**

### **RNA-seq and *de novo* assembly**

Total RNA was prepared from fat bodies of migratory locusts using Invitrogen TRIzol<sup>®</sup> Reagent (Life technologies, USA). Enrichment of mRNA, fragment interruption, addition of adaptors, size selection and PCR amplification of RNA-Seq were performed by Beijing Berry Genomics Co., Ltd (Beijing, China). Sequencing was performed using Illumina HiSeq™ 2500.

The raw reads were first filtered by removing the reads flagged as either adaptors or low quality using NGS QC Toolkit (1). Clean reads were *de novo* assembled using the Trinity software (Version 2013-02-25) at the parameters of “--seqTypefq --JM 60G --min\_contig\_length 200 --bflyHeapSpaceMax 50G ” (2). Short reads from each library were first assembled into unigenes separately. These unigenes were then combined to cluster out no-redundant unigenes using cd-kit (parameter: “-c 0.95 -T 48 -n 8”) (3). The clustered unigenes were blasted against all sequences of two insect parasites (*Nosema bombycis* and *Nosema locustae*) to delete suspected parasite transcripts. The filtered unigenes were subjected to further annotation.

### **Function annotation**

Function of unigenes was annotated by BLASTxing with E-value threshold of  $10^{-5}$  to protein databases including the NCBI non-redundant (NR) database and the Kyoto Encyclopedia of Genes and Genomes (KEGG) database (4). Based on NR annotation, Gene ontology (GO) classification was obtained by WEGO (5) (<http://wego.genomics.org.cn/cgi-bin/wego/index.pl>) via GO id annotated by

Blast2GO (Version 2.3.4) (6). The annotated KEGG ontology (KO) numbers of unigenes were mapped back to the KEGG database to get pathways through KEGG mapper ([http://www.genome.jp/kegg/tool/map\\_pathway2.html](http://www.genome.jp/kegg/tool/map_pathway2.html)).

### **Expression analysis**

Bowtie 2 (Version 2.3.4) (7) was used to map reads back to the transcriptome at the parameters of “--end-to-end -I 0 -X 500”. Then the number of mapped clean reads for each unigene was counted and then normalized into RPKM value (Reads Per Kilo base per Million reads), which was widely used to calculate the unigene expression (8). The differentially expressed unigenes were examined using DESeq software ( $P < 0.01$  and fold change  $> 2$ ) (9). The GO classifications were compared between up-regulation and down-regulation unigenes using WEGO (5). Annotated KO ids of DEGs were mapped back to the KEGG database to get pathways through KEGG mapper.

### **Gene Ontology and KEGG pathway enrichment analyses**

To assign putative biological functions and pathway involvement to the unigenes, enrichment analysis was carried out using R language. To compare these unigenes to the whole locust transcriptome background, the hypergeometric test was applied to find significantly enriched GO terms and pathways. The formula of enrichment test was:

$$P = 1 - \sum_{i=0}^{m-1} \frac{\binom{M}{i} \binom{N-M}{n-i}}{\binom{N}{n}}$$

N: the total number of unigenes with GO or KEGG pathway annotation; n: the

number of DEGs in N; M: the number of unigenes that were annotated to certain GO or pathway terms; m: the number of DEGs in M. The initially obtained *P*-values were then adjusted using a Bonferroni-Correction and a corrected *P*-value of 0.05 was adopted as a threshold.

### **Quantitative RT-PCR analysis**

Total RNA was extracted from fat bodies using Invitrogen TRIzol<sup>®</sup> Reagent (Life technologies, USA), and the first-strand cDNA was synthesized using Revert Aid<sup>™</sup> First Strand cDNA Synthesis Kit (Fermentas, USA). The cDNA was serially diluted 3-fold and the dilutions were used for analyzing PCR efficiency of primers. The preparation of RT-PCR mixture was conducted as instructed by the manual of the SYBR<sup>®</sup> Premix Ex Taq<sup>™</sup> (Tli RNaseH Plus) (Takara, China). The reactions were performed on a LightCycler 1.5 instrument (Roche, USA) using the two-step method, which was initiated by 30s at 95°C, then followed by 45 cycles of 95°C for 5s, 60°C for 20s, and completed with a melting curve analysis program. The specificity of qRT-PCR primers was confirmed by melting curve and sequencing of qRT-PCR products. The reference gene is  $\beta$ -actin gene (Genbank accession number: KC118986). The  $2^{-\Delta\Delta C_t}$  method was used to calculate gene expression levels (10). All primers are presented in Table S1.

## Supporting Results

### RNA sequencing and *de novo* assembly

To systematically investigate the effect of *P. locustae* infection on locusts, two libraries [Control locusts (CL) and infected locusts (IL)] were constructed for RNA-Seq. Total RNA was prepared from fat bodies of control healthy locusts and infected ones 16 days post-inoculation. The locust's genome is very large (~6,500 Mb), and it has not been sequenced yet (11). In order to achieve a high coverage of the gene content of the locust, each of our libraries produced more than 89 Mb raw reads (>8.5 Gb nucleotides) with a single read length about 100bp (Table S2). We removed about 13% of these reads flagged as either adaptors or low quality, each library remaining more than 78 Mb clean reads (>7.4Gb nucleotides) with Q20 percentage (percentage of sequences with sequencing error rate lower than 1%) over 97% (Table S2).

We adopted an optimized procedure to do *de novo* assembly (12), and reads from two libraries were assembled into unigenes separately and then combined for clustering to obtain a new set of unigenes for following analysis. Short reads from two libraries were assembled by Trinity (2) into 4,680,373 (a mean length of 57bp) and 1,470,285 contigs (a mean length of 74bp) for CL and IL, respectively (Table S3). Further assembly generated 53,878 unigenes from CL and 78,362 from IL (Table S3). The unigenes from the two libraries were then combined and a cluster analysis using cd-kit (3) gave 78,343 non-redundant unigenes with a mean length of 749bp. At 16 days post-inoculation, the parasite could infect the fat body and its mRNA thus

contaminated the insect's RNA collected from fat body. In order to eliminate suspected parasite RNA, the clustered unigenes were blasted against all sequence of two insect parasites (*Nosema bombycis* and *Nosema locustae*), and 1.2% (949 sequences) suspected parasite transcripts were removed (cut off E-value:  $1e^{-5}$ ). The final number of clean unigenes was 77,349, with a mean length of 724bp. A N50 (half of the assembled bases were incorporated into unigenes) length of 1,320bp was obtained, with one third (28,143 unigenes) having a length over 500bp (Fig. S8). All these clean unigenes were subjected to following function annotation.

### **Function annotation**

In order to get information of pathway and GO function from the unigenes determined by *de novo* assembly, NCBI NR database, the KEGG database were selected as the annotation reference. Approximately 33% of unigenes (25,312) were annotated by BLASTX with a threshold of  $10^{-5}$ . This annotation percentage is low, but comparable to previous annotation based on the data generated from locust's RNA-Seq projects (13). Among these annotated unigenes, 23,809 were annotated in both databases, while a small number of unigenes could only be annotated to either the NR database (1,193 unigenes) or KEGG (310 unigenes) (Fig.S9A). Based on NR annotation and the E-value distribution, 70% of the mapped sequences showed strong homology (E-value  $< 10^{-20}$ ), and 43% were very strong homology (E-value  $< 10^{-50}$ ) to previously annotated sequences (Fig.S9B). The 25 top-hit species based on NR annotation are shown in Fig.S9C. Nearly 34% of unigenes were annotated from 5 top-hit species, i.e., the body louse *Pediculus humanus corporis*, the red flour beetle

*Tribolium castaneum*, the leaf cutter bee *Megachile rotundata*, the wasp *Nasonia vitripennis*, and the aphid *Acyrtosiphon pisum*. There 5,717 unigenes were classed into three gene ontology categories: cellular component, biological process and molecular function. Under the cellular component category, the top 3 subcategories were cell, cell part and organelles; in the biological process category were metabolic process (2,550 unigenes, 44.6%) and cellular process (2,710 unigenes, 47.4%); in the molecular function category were binding (2,786 unigenes, 48.7%) and catalytic activity (2,874 unigenes, 50.3%) (Fig. S10).

There were 6, 078 unigenes mapped into 329 KEGG pathways using the annotated KO. The maps with the largest number of unigenes (excluding the global pathways ko01100, ko01110 and ko01120) were ubiquitin mediated proteolysis (ko04120, 299unigenes, 4.92%), followed by RNA transport (ko03013, 294 unigenes, 4.84%) and pathways in cancer (ko05200, 283 unigenes, 4.65%) (Fig. S11).

### **Expression profiling**

RPKM was used to calculate the expression of unigenes (8). All 77,387 unigenes were expressed in CL and/or IL. When RPKM is over 1, the number of unigenes in CL was bigger than IL, but for low expression category (RPKM < 1), the IL had more unigenes than CL. The trend is also true for annotated unigenes (Table S4). Among the expressed unigenes, 1,684 were differentially expressed between IL and CL (fold change > 2 and  $P < 0.01$  based on DESeq) (9), among which 861 were up-regulated and 823 down-regulated. The proportions and comparisons between up-regulated and down-regulated unigenes were summarized in three main GO functional categories



(Fig. S8). The results obtained from GO enrichment were presented in Table S5.

## References

1. Patel RK, Jain M (2012) NGS QC Toolkit: a toolkit for quality control of next generation sequencing data. *PLoS One* 7(2):e30619.
2. Grabherr MG, *et al.* (2011) Full-length transcriptome assembly from RNA-Seq data without a reference genome. *Nat Biotechnol* 29(7):644-652.
3. Li W & Godzik A (2006) Cd-hit: a fast program for clustering and comparing large sets of protein or nucleotide sequences. *Bioinformatics* 22(13):1658-1659.
4. Kanehisa M & Goto S (2000) KEGG: kyoto encyclopedia of genes and genomes. *Nucleic Acids Res* 28(1):27-30.
5. Ye J, *et al.* (2006) WEGO: a web tool for plotting GO annotations. *Nucleic Acids Res* 34(Web Server issue):W293-297.
6. Conesa A, *et al.* (2005) Blast2GO: a universal tool for annotation, visualization and analysis in functional genomics research. *Bioinformatics* 21(18):3674-3676.
7. Langmead B & Salzberg SL (2012) Fast gapped-read alignment with Bowtie 2. *Nat Methods* 9(4):357-359.
8. Mortazavi A, Williams BA, McCue K, Schaeffer L, & Wold B (2008) Mapping and quantifying mammalian transcriptomes by RNA-Seq. *Nat Methods* 5(7):621-628.
9. Anders S & Huber W (2010) Differential expression analysis for sequence count data. *Genome Biol* 11(10):R106.
10. Livak KJ, Schmittgen TD (2001) Analysis of relative gene expression data using realtime quantitative PCR and the  $2^{-\Delta\Delta CT}$  method. *Methods* 25:402– 408.
11. TR G (2010) Animal Genome Size Database. <http://www.genomesize.com>.
12. Chen S, *et al.* (2010) De novo analysis of transcriptome dynamics in the migratory locust during the development of phase traits. *PLoS One* 5(12):e15633.
13. Wang Y, Yang P, Cui F, & Kang L (2013) Altered immunity in crowded locust reduced fungal (*Metarhizium anisopliae*) pathogenesis. *PLoS Pathog* 9(1):e1003102.

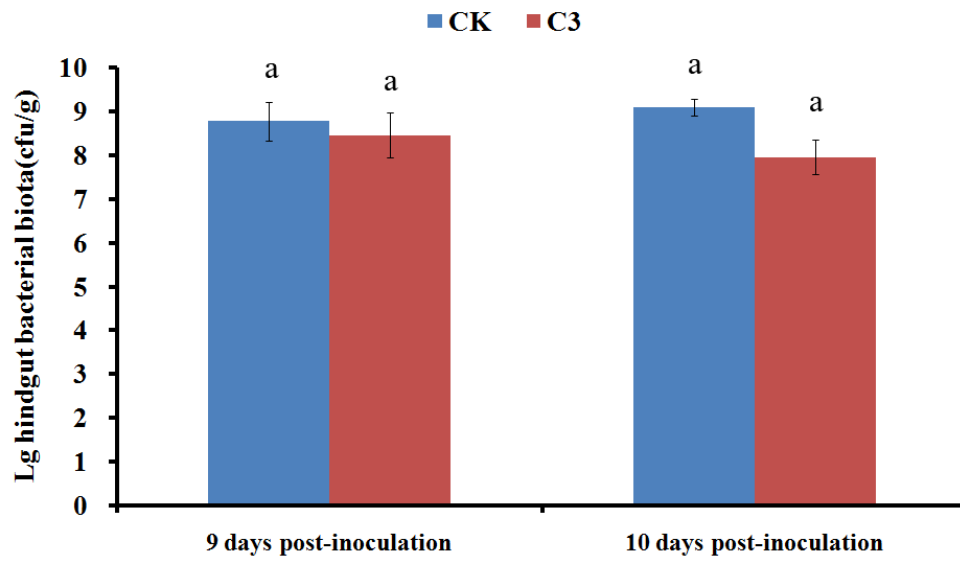

**Fig. S1.** Hindgut bacterial populations (mean  $\pm$  SE) of *L. migratoria* 9 and 10 days post-inoculation with *P. locustae*. CK: uninfected locusts (blue); C3: locusts infected with 20,000 *P. locustae* spores (red). Values with the same letters are not significantly different ( $P < 0.05$ ) (Kruskal-Wallis test).

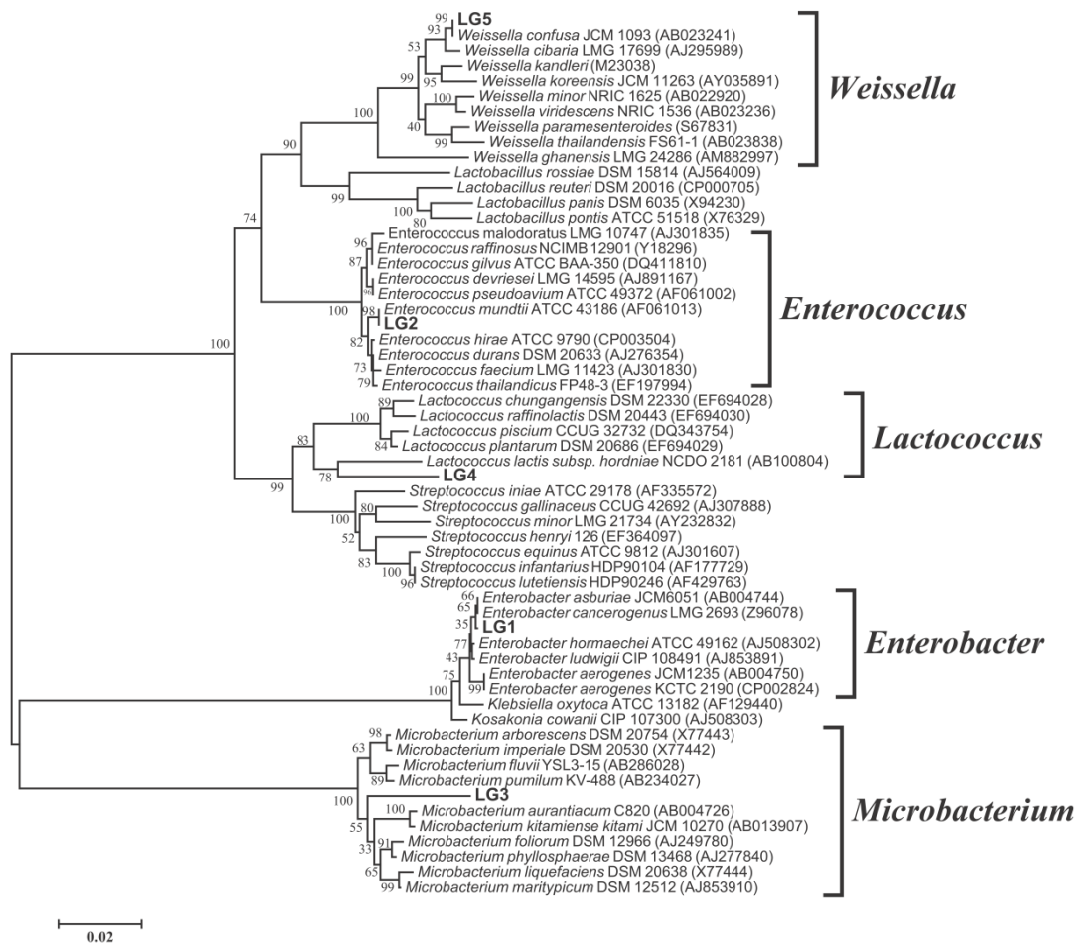

**Fig. S2.** Phylogenetic analysis using neighbor-joining algorithm provided by MEGA 5.1 of 16s rRNA sequences from the 5 primary hindgut bacteria [LG1(locust gut bacterium), LG2, LG3, LG4 and LG5] and bacterial type strains. The 16s rRNA sequences of the type strains were retrieved from NCBI database. Bootstrap values are adjacent to each internal node, representing the percentage of 1,000 bootstrap replicates. Bar: 0.02 substitution per nucleotide positions. The 16s rRNA sequences of the hindgut bacteria are shown in Table S7.

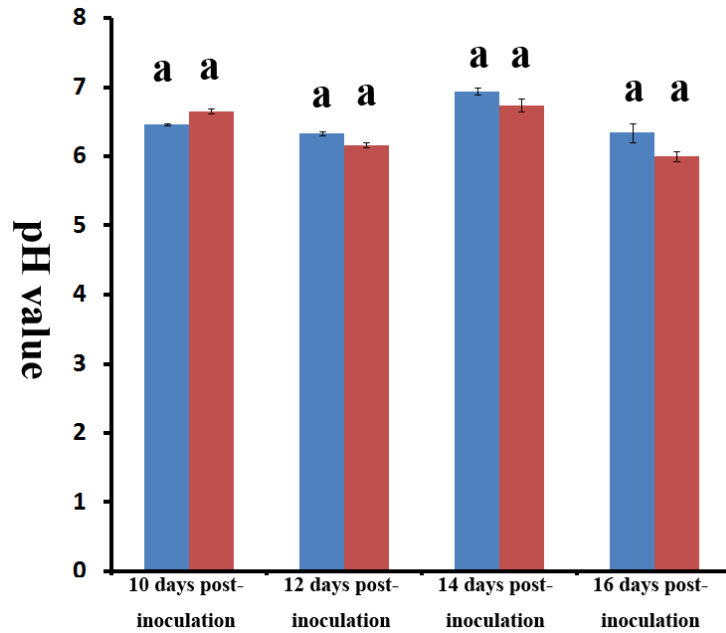

**Fig. S3.** pH values (mean  $\pm$  SE) of the supernatant of midgut contents of healthy locusts (blue) and *P. locustae*-infected ones (red). The inoculation dose was 20,000 spores/3rd instar nymph, and pH measurement was conducted 10, 12, 14 and 16 days post-inoculation. Values with different letters are significantly different ( $P < 0.05$ ) (Kruskal-Wallis test). No significant difference in pH value of the midguts was found between control healthy locusts and the ones infected by *P. locustae*.

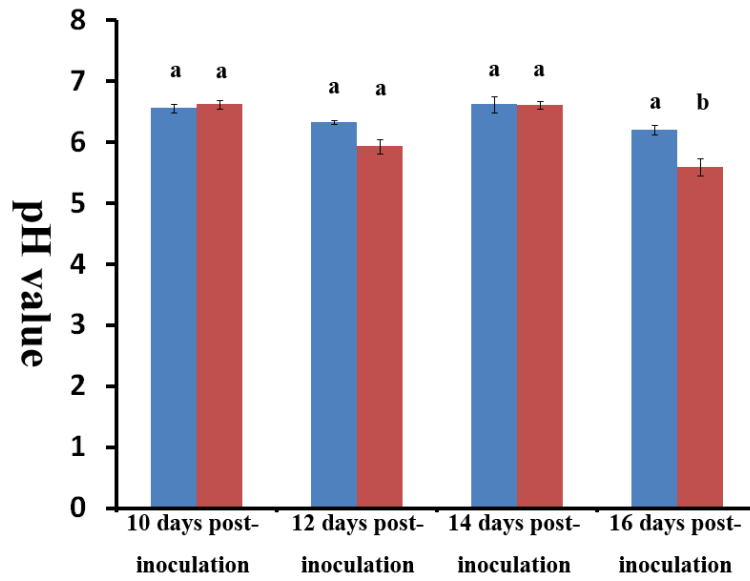

**Fig. S4.** pH values (mean  $\pm$  SE) of the supernatant of hindgut contents of healthy locusts (blue) and *P. locustae*-infected ones (red). The inoculation dose was 20,000 spores/3rd instar nymph, and pH measurement was conducted 10, 12, 14 and 16 days post-inoculation. Values with different letters are significantly different ( $P < 0.05$ ) (Kruskal-Wallis test).

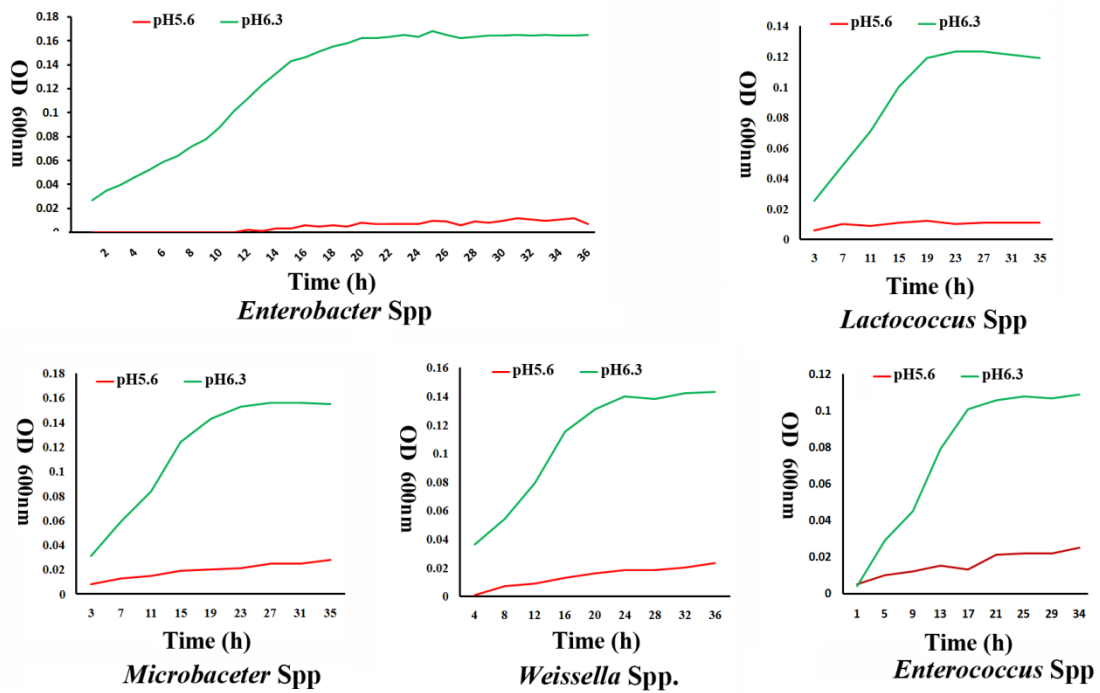

**Fig. S5.** The effect of pH on the growth of 5 primary hindguts bacteria from the migratory locust. Bacteria grew in Luria-Bertani broth with pH of 5.6 (red) and 6.3 (green).

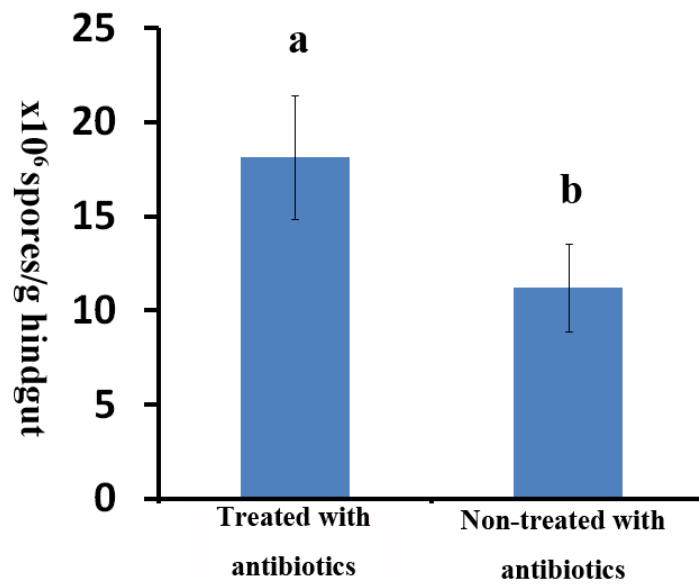

**Fig. S6.** Colonization resistance of gut bacteria against *P. locustae* infection. The insects were fed with an antibiotic cocktail for 2 days before inoculation with *P. locustae* (20,000spores/3rd instar nymph). At 16 days post-inoculation, these locust hindguts were dissected, weighed and homogenized in sterile water for spore counting. Values with different letters are significantly different ( $P < 0.05$ ) (Kruskal-Wallis test).

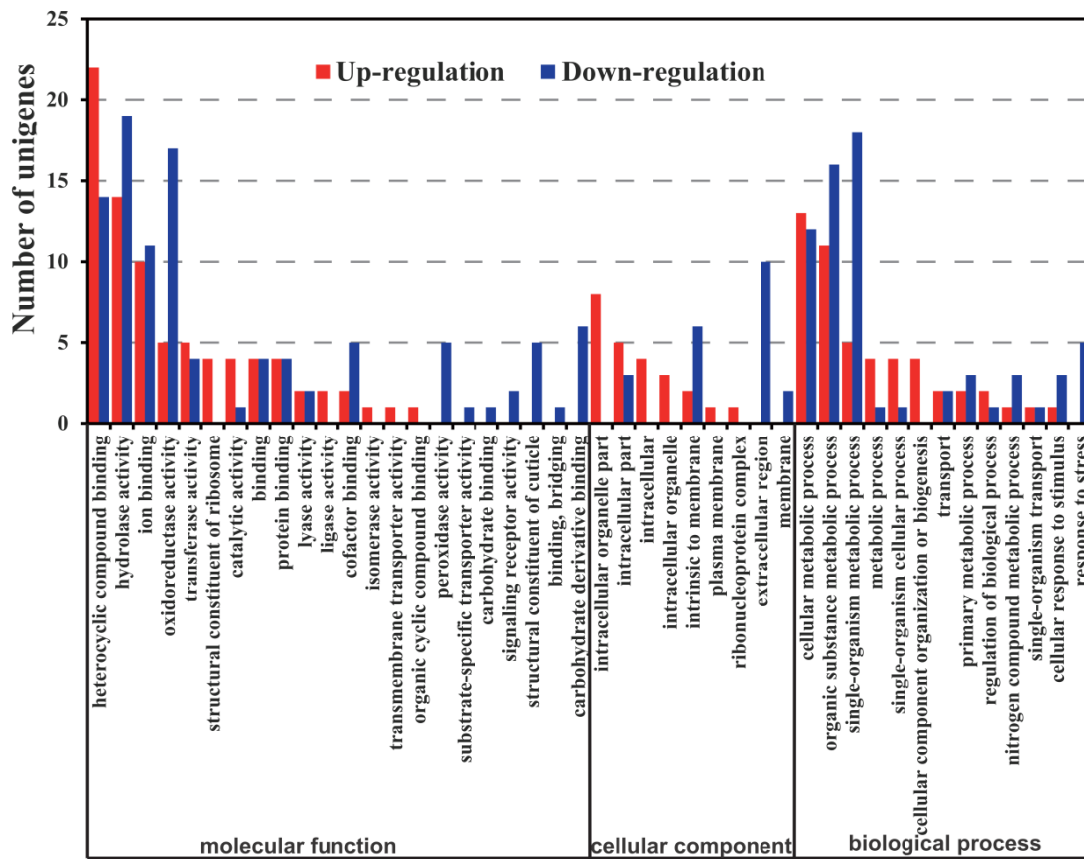

Fig. S7. Go classification for up-regulated and down-regulated unigenes



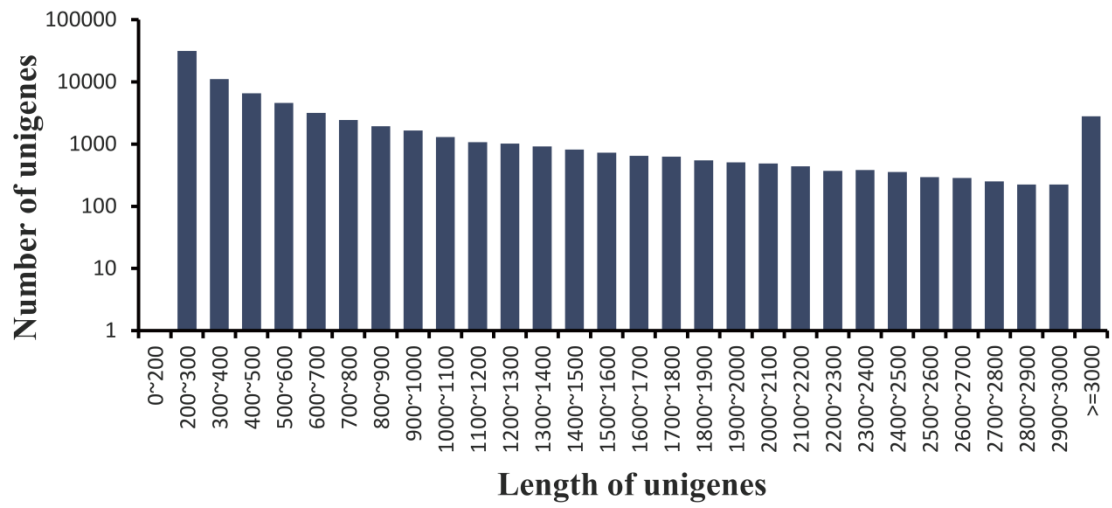

**Fig. S8.** Length distribution of clean unigenes

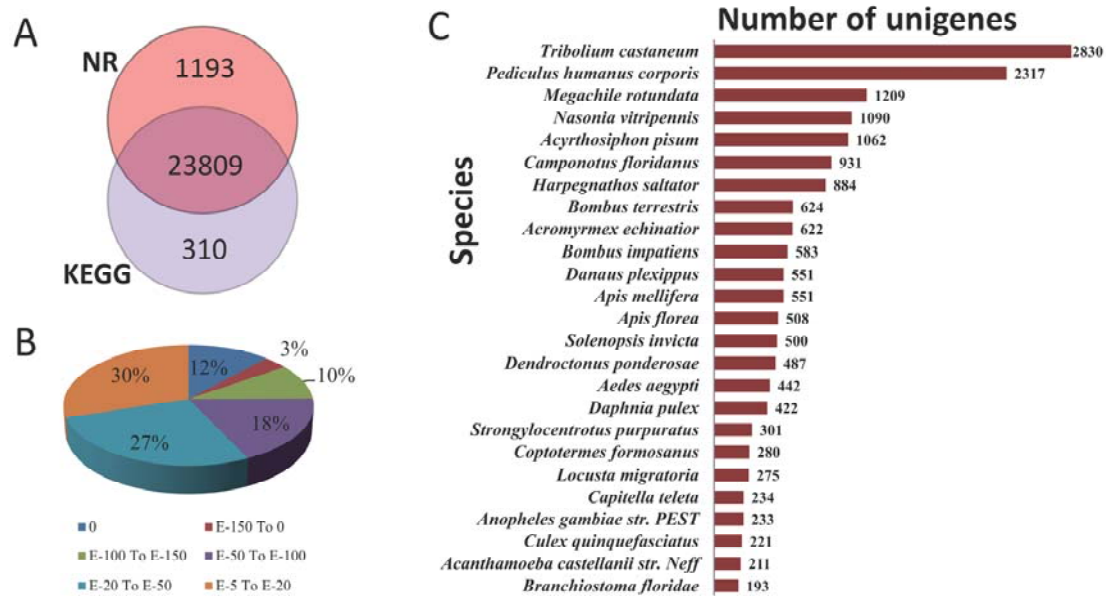

**Fig. S9.** Functional annotation of unigenes. (A) Venn diagram of number of unigenes annotated by BLASTX with an E-value threshold of  $10^{-5}$  against protein databases (NR and KEGG); (B) E-value distribution of the BLASTX hits of unigenes against the NR database; (C) The Number of unigenes that have significant similarity to each of the top 25 species using BLASTX in the NR database.

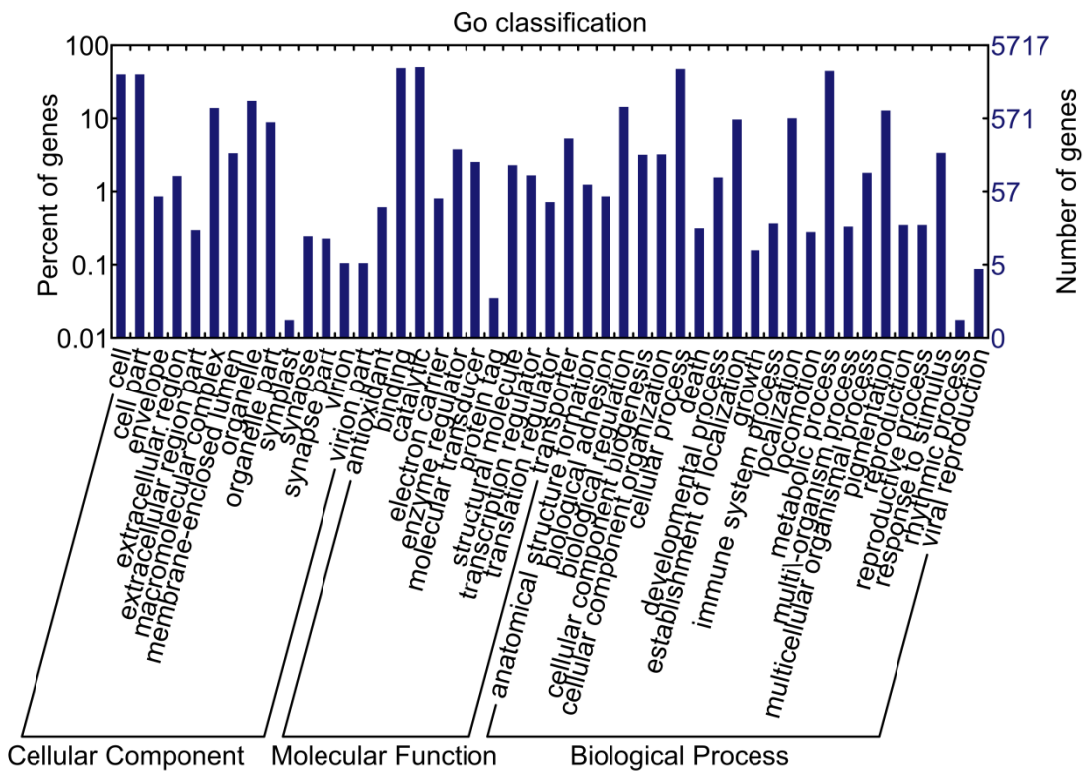

**Fig. S10.** Histogram presentation of GO classification. The results are summarized in three main categories: biological process, cellular component and molecular function. The right y-axis indicates the number of genes in a category. The left y-axis indicates the percentage of a specific category of genes in that main category.

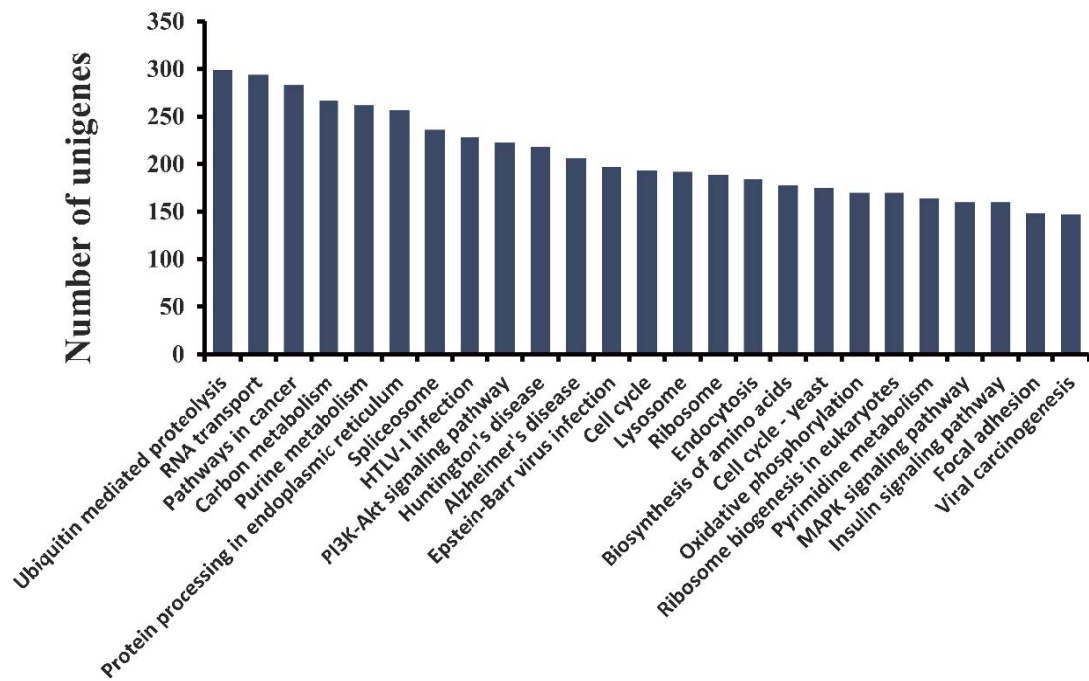

**Fig. S11.** The top 25 annotated pathways identified by KEGG.

**Table S1.** Primers for quantitative RT-PCR validation of selected differentially expressed unigenes related to tyrosine hydroxylase and primers for 16s rRNA cloning

| Genes                               | Fold Change (CL/IL) |         | Primers                                                   |
|-------------------------------------|---------------------|---------|-----------------------------------------------------------|
|                                     | RNA-Seq             | qRT-PCR |                                                           |
| <b>Tyrosine hydroxylase</b>         |                     |         |                                                           |
| DEG1 (pale)<br>(comp101707_c0_seq1) | 26.8                | 37.4    | GAGCGGGA ACTATAACAATGGG<br>GCTTCTCGTCCACTCGTTC            |
| DEG2<br>(comp109641_c0_seq4)        | 20.5                | 34.4    | GGCATCGTTGTAGGTCTGG<br>GAAGTCCTACAGCATCGAGAAC             |
| $\beta$ -actin                      |                     |         | GCAAAGCTGGCTTCGCCG<br>ATGTTCTCGGGCGCCAC                   |
| 16s rRNA                            |                     |         | 5'-CAGGCCTAACACATGCAAGTC-3'<br>5'-GGGCGGTGATGTACAAGGC -3' |

**Table S2.** Overview of data and quality of RNA-seq

| <b>Sample</b> | <b>Raw Reads</b> | <b>RawData (Mb)</b> | <b>CleanReads</b> | <b>CleanData (Mb)</b> | <b>N<sup>a</sup> (%)</b> | <b>GC<sup>b</sup> (%)</b> | <b>Q20<sup>c</sup> (%)</b> |
|---------------|------------------|---------------------|-------------------|-----------------------|--------------------------|---------------------------|----------------------------|
| IL            | 101,365,130      | 9,666.93            | 88,726,176        | 8,461.59              | 0                        | 47.91                     | 97.81                      |
| CL            | 89,417,790       | 8,527.54            | 78,232,536        | 7,460.84              | 0                        | 47.94                     | 97.85                      |

Note: N<sup>a</sup>: the percentage of nucleotides which were not sequenced;

GC<sup>b</sup>: the percentage of GC content of the sequences;

Q20<sup>c</sup>: the percentage of sequences with sequencing error rate lower than 1%.

The three parameters (N, GC and Q20) are about clean data.

**Table S3.** Statistics of *de novo* assembly of locust contigs and unigenes.

| Statistics                       | Contig    |           | Unigene |        |                       |                       |
|----------------------------------|-----------|-----------|---------|--------|-----------------------|-----------------------|
|                                  | CL        | IL        | CL      | IL     | Combined <sup>a</sup> | Filtered <sup>b</sup> |
| Number of sequence               | 4,680,373 | 1,470,285 | 53,878  | 78,362 | 78,343                | 77,394                |
| Large sequence ( $\geq 1000$ bp) | 9,019     | 10,490    | 17,066  | 12,157 | 14,986                | 14,328                |
| Max sequence length (bp)         | 20,554    | 52,998    | 39,046  | 20,554 | 39,046                | 20,554                |
| Mean sequence length (bp)        | 57        | 74        | 1,063   | 634    | 749                   | 724                   |
| N50 length (bp)                  | 49        | 62        | 2,039   | 933    | 1411                  | 1320                  |
| Total bases (Mb)                 | 258.63    | 104.66    | 54.65   | 47.44  | 55.99                 | 53.46                 |

Note: a: Total unigenes predicted by clustering unigenes from CL and IL;

b: Total unigenes predicted by removing suspected parasite sequences from a.

**Table S4.** Expression abundance measurements of CL and IL

|                       | <b>CL</b> | <b>CL (annotated)</b> | <b>IL</b> | <b>IL (annotated)</b> |
|-----------------------|-----------|-----------------------|-----------|-----------------------|
| <b>RPKM 0-1</b>       | 48,718    | 11,339                | 57,127    | 13,403                |
| <b>RPKM 1-10</b>      | 24,313    | 10,840                | 16,432    | 8,967                 |
| <b>RPKM 10-100</b>    | 3,583     | 2,612                 | 3,169     | 2,451                 |
| <b>RPKM &gt;100</b>   | 773       | 521                   | 659       | 491                   |
| <b>Total detected</b> | 77,387    | 25,312                | 77,387    | 25,312                |



**Table S5.** GO enrichment result of DEGs

| <b>GO Term</b>                                      | <b>Go id</b> | <b>P-value</b> | <b>FDR</b> |
|-----------------------------------------------------|--------------|----------------|------------|
| nitric-oxide synthase activity                      | GO:0004517   | 3.26E-06       | 0.0002476  |
| nitric oxide biosynthetic process                   | GO:0006809   | 3.26E-06       | 0.0002476  |
| extracellular region                                | GO:0005576   | 4.66E-06       | 0.0002476  |
| heme binding                                        | GO:0020037   | 6.08E-06       | 0.0002476  |
| chitin binding                                      | GO:0008061   | 9.89E-06       | 0.0002841  |
| retinyl-palmitate esterase activity                 | GO:0050253   | 1.05E-05       | 0.0002841  |
| calmodulin binding                                  | GO:0005516   | 1.47E-05       | 0.0003425  |
| structural constituent of cuticle                   | GO:0042302   | 3.27E-05       | 0.0006318  |
| triglyceride lipase activity                        | GO:0004806   | 4.12E-05       | 0.0006318  |
| retinol metabolic process                           | GO:0042572   | 4.12E-05       | 0.0006318  |
| FMN binding                                         | GO:0010181   | 4.26E-05       | 0.0006318  |
| chitinase activity                                  | GO:0004568   | 9.71E-05       | 0.0011786  |
| chitin catabolic process                            | GO:0006032   | 9.71E-05       | 0.0011786  |
| lipid catabolic process                             | GO:0016042   | 0.000101227    | 0.0011786  |
| cell wall macromolecule catabolic process           | GO:0016998   | 0.000137881    | 0.0014983  |
| peroxidase activity                                 | GO:0004601   | 0.000179096    | 0.0017529  |
| flavin adenine dinucleotide binding                 | GO:0050660   | 0.000182815    | 0.0017529  |
| NADP binding                                        | GO:0050661   | 0.000333391    | 0.003019   |
| peroxidase reaction                                 | GO:0006804   | 0.000373007    | 0.0032     |
| response to oxidative stress                        | GO:0006979   | 0.00043978     | 0.0035842  |
| oxidation-reduction process                         | GO:0055114   | 0.000495691    | 0.0038475  |
| iron ion binding                                    | GO:0005506   | 0.000520964    | 0.0038599  |
| peptide cross-linking                               | GO:0018149   | 0.001424996    | 0.0100989  |
| fatty-acyl-CoA reductase (alcohol-forming) activity | GO:0080019   | 0.002808837    | 0.0190767  |
| Phosphopyruvate hydratase complex                   | GO:0000015   | 0.00461391     | 0.0289257  |
| Phosphopyruvate hydratase activity                  | GO:0004634   | 0.00461391     | 0.0289257  |
| oxidoreductase activity                             | GO:0016491   | 0.007639834    | 0.0455528  |
| cellular protein metabolic process                  | GO:0044267   | 0.007825015    | 0.0455528  |

**Table S6. Sequences of unigenes clustered in KEGG ontology of tyrosine hydroxylase**

>comp101707\_c0\_seq1 (the gene *pale*)

CCGACACACTCGCCAGCGGGCCGCTACTCGTCGGAGACGTGCTCGACTCCCCTGTGACGGAAGTCGTCACCGGTAGCAGC  
CGTCTCTCTGCACCGCTAGCGTGGGCTGGATCTGCAGTGGGCTACGAGCGGGAATAACAATGGGTACGACGATGGGGA  
CGATGCGGACGCTAAGTACTTGGGAGAGCGCGGGGAAACGAGTGGACGAGAAGCGCTCCTTAGGCGAAGTTGGCCTTGAG  
CTTGCCAGCGCGTTATTGAGGTGCAGCACCTCGAGGTTGAGCTGCGACAGGCAGCCCTCCAGCCGCTCCACCGAGTCCAG  
CACCTCGACGCGCTGCGTGTGCGGGTTGTAGCGCACCTCGAACTTGCGGGACATGCCGCTGGCCACCCACCTCTGAACTT  
GTCCTTGGCGTCTCGAAGCTCTCGGGCAGCTAGTAGACGGGCTGGACGTCCTGGTCTGGTAGGGCTGGATGGCGGTGAG  
CGAGGGCTCGAAGGGCCGGTGTCTGGGCTTGTGCGACACGGCGTGCAGCAGCTCGCGCTGCGACAGCAGGCCGGCGC  
CGTACGCCCTCAGCTGGCCCTTCTCCTTGCACAGGCCGAATCCACCGTGAACCAGTACACCGTCGATAGCTTCTCGATCTC  
CGCTCGGACGCGCCAGCGAAGCCAGGCCGATCTTTCGAGAACTGCGGAAGCTGGGGTCAGCCAGCAGCGGCAITG  
GCCCCGATCAGCTCGTGGATGCAGTCGGGCTTGGCGTGTGGGTGGGCGACGAGGTGTGGCGGACGACTGCGTGTCTGGA  
AGATGCGGAACGCCAGGCTGGCCAGGAAGTCGCGCGCCGTGAGCAGGCCGCGGGCCGACGCCGAAGCCCGTGTG  
CTTGCTCATGAAGTTGGACATGTCTCGAGCTGCGGGATGCGCTCTCGGTGAAGATGCCCGCTCTGCAGCAGCTTGAAG  
ACGCGCCGGTACTCGGCGCACGCGTACTTGGGCAGCAGGTCGACCGTGGCGGGAACACCTGCTTCCACGTGGCCGTCTCC  
TGGGGCGTGTACTCGATGCGGG

>comp109641\_c0\_seq4

CGCCGCCGGCTGGCCGTTGGTCAGGGGCTGCTCTGGTTCTTGGTTGCTGCGGATCGGCGACCTCGTTTGGCACCTCGCT  
AGCGTCATCGCCACTTCTGTTGCGGTAATTTCTTCTTGCATGTGTTTTCGATTCTTCTGTGGTAGGCAAATCTTCTCCTG  
CACCGGTTTACCTCGGCAGAGTCAGTTGGGGCATCGTTGTAGGTCTGGCGGGCTCCTCCAGCACGCTCTGCTTGGTCTGC  
TTGACGACCAGCGTCTCGAAGCGGGCGTCTGCGACGAGCGAGCGCGCCGCGACGGGTAGCCGTTCTCGATGCTGTAGGA  
CTTCTTGATGGCGAACATCTCGCGATTCTTCTGGGCAGCGGCTACGGCCATCATGTCTGAGGGTTG

**Table S7. Sequences of 16S rRNA from 5 primary hindgut bacteria**

>LG1 (*Enterobacter* spp)

GACGCTGCTGCTTGTCTGAGAGTGGCGGACGGGTGAGTAATGTCTGGGAAACTGCCTGATGGAGGGGATAACTACTGGAAA  
CGGTAGCTAATACCGCATAACGTCGCAAGACCAAAGAGGGGGACCTTCGGGCCCTTGCCATCGGATGTGCCAGATGGGAT  
TAGCTAGTAGGTGGGGTAAACGGCTACCTAGGCGACGATCCCTAGCTGGTCTGAGAGGATGACCAGCCACACTGGAAGTGA  
GACACGGTCCAGACTCCTACGGGAGGCAGCAGTGGGAATATTGCACAATGGGCGCAAGCCTGATGCAGCCATGCCGCGTG  
TATGAAGAAGGCCCTTCGGTTGTAAAGTACTTTCAGCGGGGAGGAAGGCGATAAGGTTAATAACCTTGTCGATTGACGTTAC  
CCGCAGAAGAAGCACCGGCTAACTCCGTGCCAGCAGCCGCGTAATACGGAGGGTGCAAGCGTTAATCGGAATTACTGGGC  
GTAAAGCGCACGACGGCGGTCTGTCAAGTCGGATGTGAAATCCCCGGGCTCAACCTGGGAACGCAITCGAAACTGGCAGG  
CTAGAGTCTTGTAGAGGGGGTAGAATTCCAGGTGTAGCGGTGAAATGCGTAGAGATCTGGAGGAATACCGTGGCGAAGG  
CGGCCCTTGACAAAGACTGACGCTCAGGTGCGAAAGCGTGGGAGCAAACAGGATTAGATACCCTGGTAGTCCACGCC  
GTAAACGATGTCGACTTGGAGGTTGTGCCCTTGGGCGTGGCTCCGGAGCTAACGCGTTAAGTCGACCGCTGGGGAGTA  
CGGCCGCAAGGTTAAACTCAAATGAATTGACGGGGCCCGACAAGCGGTGGAGCATGTGGTTAATTGATGCAACGCG  
AAGAACCTTACTACTTTGACATCCAGAGAACTTACCAGAGATGCATTGGTGCCTTCGGAACTCTGAGACAGGTGCTGCA  
TGGCTGTCGTCAGCTCGTGTGTGAAATG

>LG2 (*Enterococcus* spp)

TTACGGACTGCTACCGGGAAGAGGAGTGGCGAACGGGTGAGTAACACGTGGGTAACCTGCCATCAGAAGGGGATAACA  
CTTGAAACAGGTGCTAATACCGTATAACAATCGAAACCGCATGGTTTCGTTTTGAAAGGCGCTTTACGGTGCCTGATGG  
ATGGACCCGCGGTGCATTAGCTAGTTGGTGAGGTAACGGCTCACCAAGGCCACGATGCATAGCCGACCTGAGAGGGTGATC  
GGCCACATTGGGACTGAGACACGGCCAACTCCTACGGGAGGCAGCAGTAGGGAATCTTCGGCAATGGACGAAAGTCTG  
ACCGAGCAACGCCGCGTGAGTGAAGAAGGTTTTTCGGATCGTAAACTCTGTTGTTAGAGAAGAACAAGGGTGAGAGTAAC  
TGTTACCCCTTGACGGTATCTAACCAGAAAGCCACGGCTAACTACGTGCCAGCAGCCGCGTAATACGTAGGTGGCAAGC  
GTTGTCCGATTTATTGGGCGTAAAGCGAGCGCAGGCGTTTCTTAAGTCTGATGTGAAAGCCCCGGCTCAACCGGGGAG  
GGTCATTGAAACTGGGAGACTTGTAGTGCAGAAGAGGAGAGTGGAAATCCATGTGTAGCGGTGAAATGCGTAGATATATGG  
AGGAACACCAGTGGCGAAGGCGGCTCTCTGGTCTGTAAGTACGCTGAGGCTCGAAAGCGTGGGGAGCAAACAGGATTAG  
ATACCCTGGTAGTCCACGCCGTAACGATGAGTGTAAGTGTGGAGGGTTTCGCCCTTCAGTGCTGCAGTAAACGCATTA  
AGCACTCCGCCTGGGGAGTACGACCGCAAGGTTGAACTCAAGGAATTGACGGGGCCCGACAAGCGGTGGAGCATGTGG  
TTAATTGCAAGCAACCGGAAGAACCTTACCAGGCTTGTGACATCCTTTGACACTCTAGAGATAGAGCTTCCCCTTCGGGGG  
AAAGTGACAGTGGTGCATGGTGTG

>LG3 (*Microbacterium* spp)

TCCGAAGCATTCGATGGGGTGAAGATTCCTGCTCAACCTGCCCTGCGGAAGTGAATGCCTTGAATCACCGTCCAGACTG  
GATAAAACCACAAAGGCATCTTCAGTGGTTGAAAAGAATTCGGTTGGGGATGGGCTCGCGGCCTATCAGCTTGTGGTGA  
GGTAATGGCTACCAAGGCGTCGACGGGTAGCCGGCCTGAGAGGGTGACCGCCACACTGGGACTGAGACACGGCCAGCA  
CTCTACGGGAGGCAGCAGTGGGGAATATTGCACAATGGGCGCAAGCCTGATGCAGCAACGCCGCGTGAGGGATGACGGC  
CTTCGGGTTGTAAACCTCTTTTAGCAGGGAAGAAGCGAAAGTGACGGTACCTGCAGAAAAAGCGCCGGTAACTACGTGCC  
AGCAGCCGCGTAATACGTAGGGCGCAAGCGTTATCCGAATTATTGGGCGTAAAGAGCTCGTAGGCGGTTTGTGCGTCTG  
CTGTGAAATCCGGAGGCTCAACCTCCGGCCTGCAAGTGGGTACGGGCAGACTAGAGTGCAGGATGGGGAGATTGGAATTCCTG  
GTGTAGCGGTGGAATGCGCAGATATCAGGAGGAACACCGATGGCGAAGGCAGATCTCTGGGCCGTAACCTGACGCTGAGGAG  
CGAAAGGGTGGGGAGCAAACAGGCTTAGATACCCTGGTAGTCCACCCGTAAACGTTGGGAACCTAGTTGTGGGGTCCATTC  
CACGGATTCCGTGACGACGTAACGCATTAAGTTCGCCGCTGGGGAGTACGGCCGCAAGGCTAAACTCAAAGGAATTGA  
CGGGGACCCGACAAGCGGCGGAGCATGCGGATTAATTCGATGCAACGCAAGAACCTTACCAAGGC

>LG4 (*Lactococcus* spp)

GTGCTGCTTTTTTGGAGAGCGGCGAACGGGTGAGTAACGCGTGGGAAATCTGCCGAGTAGCGGGGACAACGTTTGAAA  
CGAACGCTAATACCGCATAACAATGAGAATCGCATGATTCTATTAAAAAGAAGCAATTGCTTCACTACTTGATGATCCCGC  
TTGTATTAGCTAGTTGGTAGTGTAAGGACTACCAAGGCGATGATACATAGCCGACCTGAGAGGGTGATCGGCCACACTGGG  
ACTGAGACACGGCCAGACTCTACGGGAGGCAGCAGTAGGGAATCTTCGGCAATGGGGCAACCTGACCGAGCAACGC  
CGCGTGAGTGAAGAAGGTTTTCCGGATCGTAAACTCTGTTGTTAGAGAAGAACGTTAAGTAGAGTGGAAAATTACTTAAGT  
GACGGTATCTAACCAGAAAGGGACGGCTAACTACGTGCCAGCAGCCGCGTAATACGTAGGTCCCAAGCGTTGTCGGATT  
ATTGGGCGTAAAGCGAGCGCAGGTGGTTTCTTAAGTCTGATGTAAGGCAAGTGGCTCAACCATTGTGTGCATTGGAAACTG  
GGAGACTTGAGTGCAGGAGAGGAGAGTGGAATTCATGTGTAGCGGTGAAATGCGTAGATATATGGAGGAACACCGGAGGC  
GAAAGCGGCTCTCTGGCCTGTAACCTGACACTGAGGCTCGAAAGCGTGGGAGCAAACAGGATTAGATACCTGGTAGTCCA  
CGCCGTAACGATGAGTGTAGCTAGGGAGCTATAAGTTCTCTGTAGCGCAGCTAACGCATTAAGCACTCCGCTGGGGA  
GTACGACCGCAAGGTTGAAACTCAAAGGAATTGACGGGGCCCGCACAAGCGGTGGAGCATGTGGTTTAATTCGAAGCAA  
CGCGAAGAACCTTACCAGGCTTGACATACTCGTGCTATCCTTAGAGATAGGAGTTCCTTCGGGACACGGGATACATGTGGT  
GCATGGTTGTCGTCAGCTCGTGTCTGTA

>LG5 (*Weissella* spp)

CGTCTCATTGAGAGCTTGCTCAGATATGACGATGGACATTGCAAAGAGTGGCGAACGGGTGAGTAAACAGTGGGAAACCTA  
CCTCTTAGCAGGGATAACATTTGGAAACAGATGCTAATACCGTATAACAATGACAACCGCATGGTTGTTATTTAAAAGATGG  
TTCTGCTATCACTAAGAGATGGTCCCGCGGTGCATTAGCTAGTTGGTAAGGTAATGGCTTACCAAGGCGATGATGCATAGCCG  
AGTTGAGAGACTGATCGGCCACAATGGGACTGAGACACGGCCATACTCTACGGGAGGCAGCAGTAGGGAATCTTCCACA  
ATGGGCGAAAGCCTGATGGAGCAACGCCGCGTGTGTGATGAAGGGTTTCGGCTCGTAAACACTGTTGTAAGAGAAGAATG  
ACATTGAGAGTAACTGTTCAATGTGTGACGGTATCTTACCAGAAAGGAACGGCTAAATACGTGCCAGCAGCCGCGTAATAC  
GTATGTTCCAAGCGTTATCCGATTTATTGGGCGTAAAGCGAGCGCAGACGGTTATTTAAGTCTGAAGTGAAGCCCTCAGC  
TCAACTGAGGAATTGCTTTGGAAACTGGATGACTTGAGTGCAGTAGAGGAAAGTGGAACTCCATGTGTAGCGGTGAAATGC  
GTAGATATATGGAAGAACACCAGTGGCGAAGGCGGCTTCTGGACTGTAACCTGACGTTGAGGCTCGAAAGTGTGGGTAGCA  
AACAGGATTAGATACCTGGTAGTCCACACCGTAAACGATGAGTGTAGGTGTTTGAGGGTTCCGCCCTTAAAGTGCCGAG  
CTAACGCATTAAGCACTCCGCTGGGAGTACGACCGCAAGGTTGAAACTCAAAGGAATTGACGGGGACCCGCACAAGCG  
GTGGAGCATGTGGTTTAATTCGAAGCACGCGAAGAACCTTACCAGTCTGACATCCTTGACACTCCAGAGATGGAGCGTTC  
CCTTCGGGGACAGGTGACA
